# Supplementary material for: Therapeutic Delivery of miR-148a Suppresses Ventricular Dilation in Heart Failure
Source: PubMed Central journal article supplement — Mol Ther. 2018 Nov 17;27(3):584–99. doi: 10.1016/j.ymthe.2018.11.011 (PMC6403487; doi:10.1016/j.ymthe.2018.11.011), 2018-11-17
Supplement: mmc1.pdf [file mmc1.pdf]

## **Supplemental Information**

### **Therapeutic Delivery of miR-148a Suppresses**

### **Ventricular Dilation in Heart Failure**

**Andrea Raso, Ellen Dirx, Leonne E. Philippen, Amaya Fernandez-Celis, Federica De Majo, Vasco Sampaio-Pinto, Marida Sansonetti, Rio Juni, Hamid el Azzouzi, Martina Calore, Nicole Bitsch, Servé Olieslagers, Martinus I.F.J. Oerlemans, Manon M. Huibers, Roel A. de Weger, Yolan J. Reckman, Yigal M. Pinto, Lorena Zentilin, Serena Zacchigna, Mauro Giacca, Paula A. da Costa Martins, Natalia López-Andrés, and Leon J. De Windt**

# Supplemental Figure 1

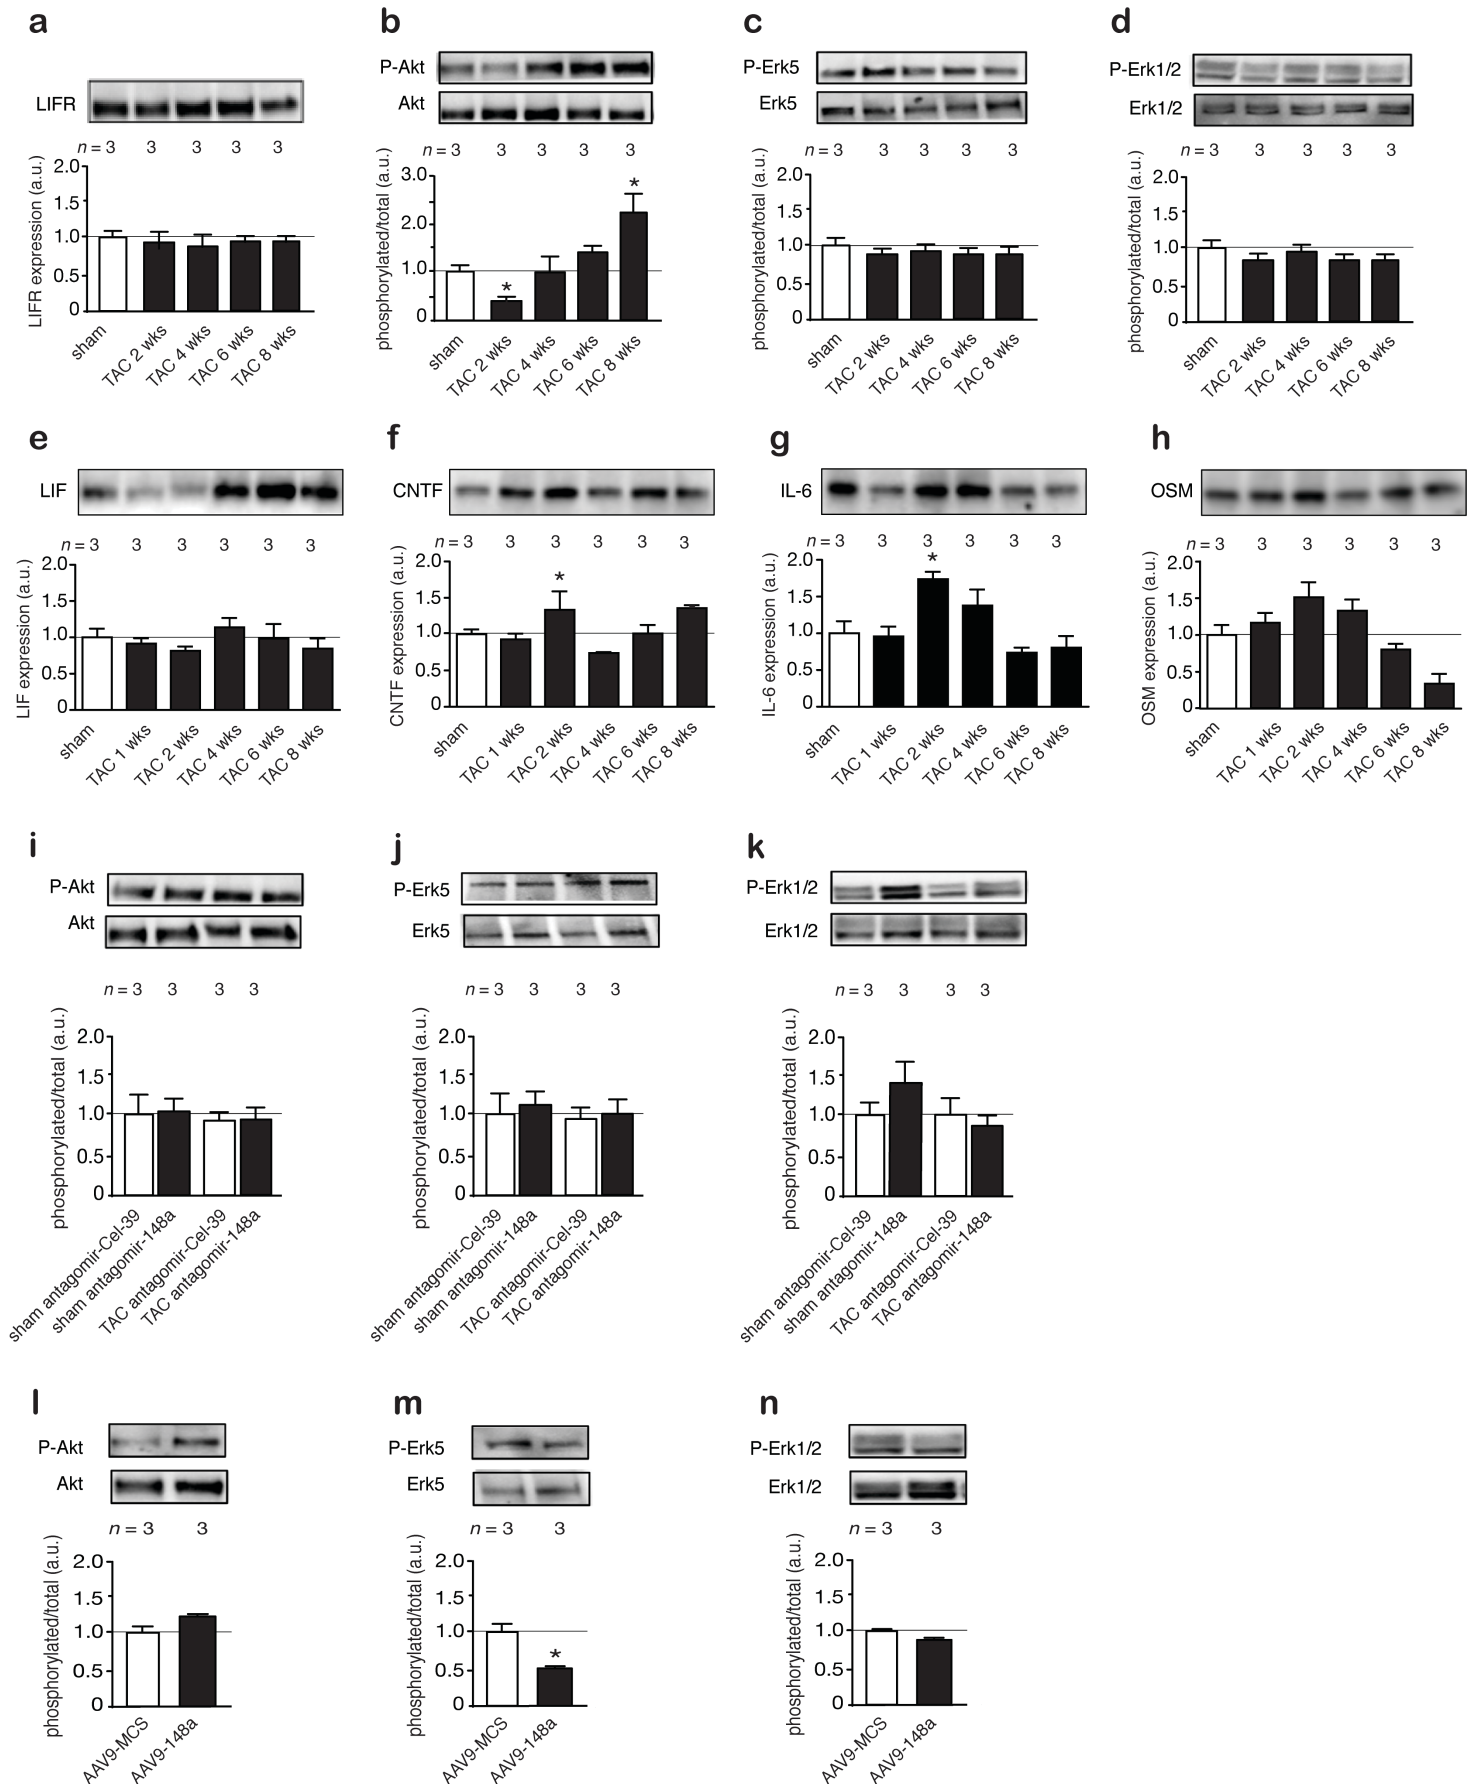

# Supplemental Figure 2

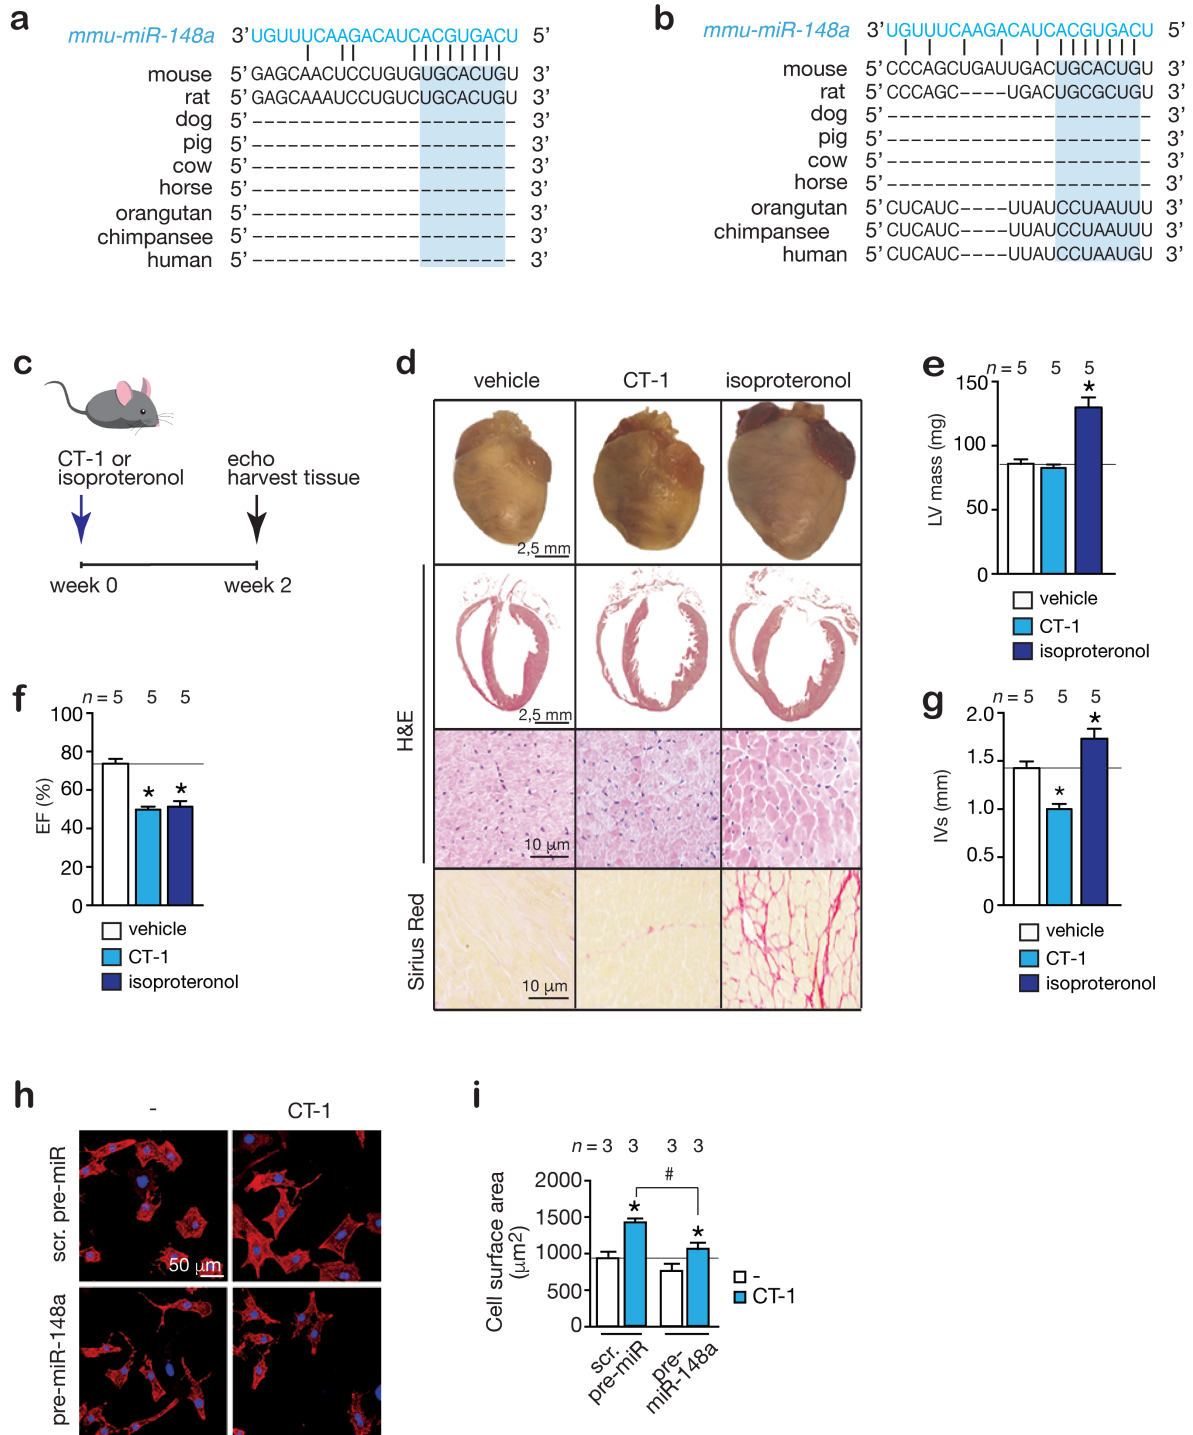

# Supplemental Figure 3

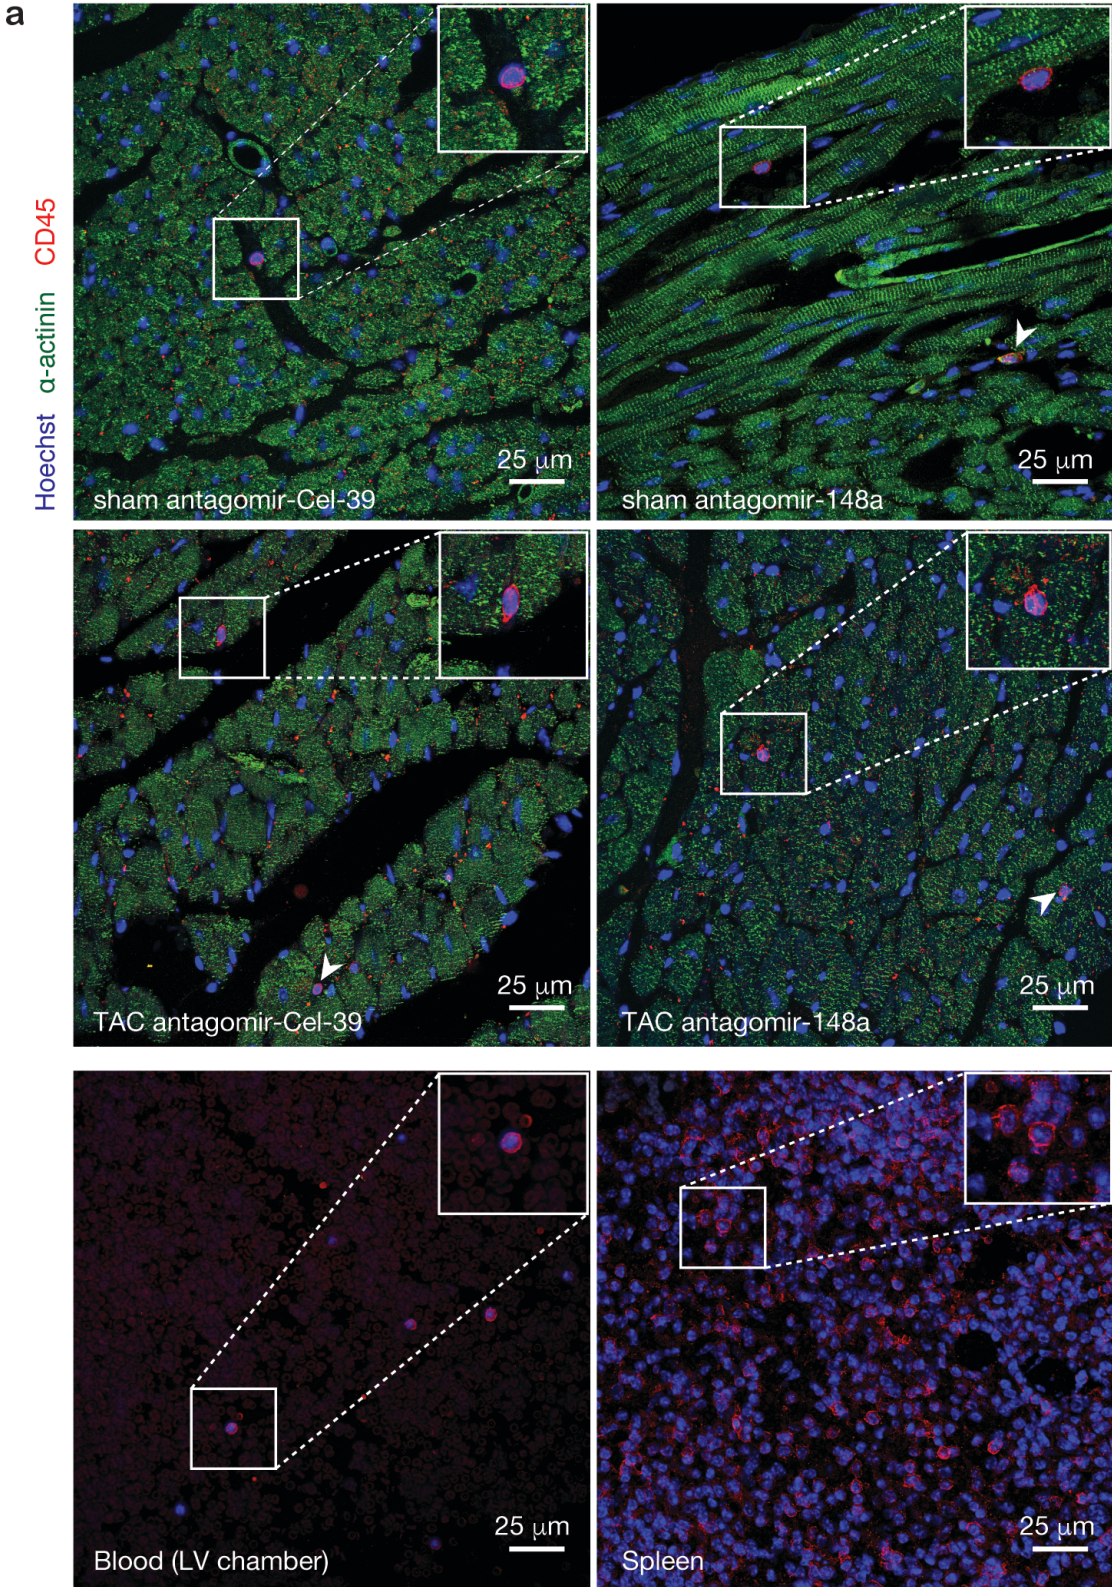

# Supplemental Figure 4

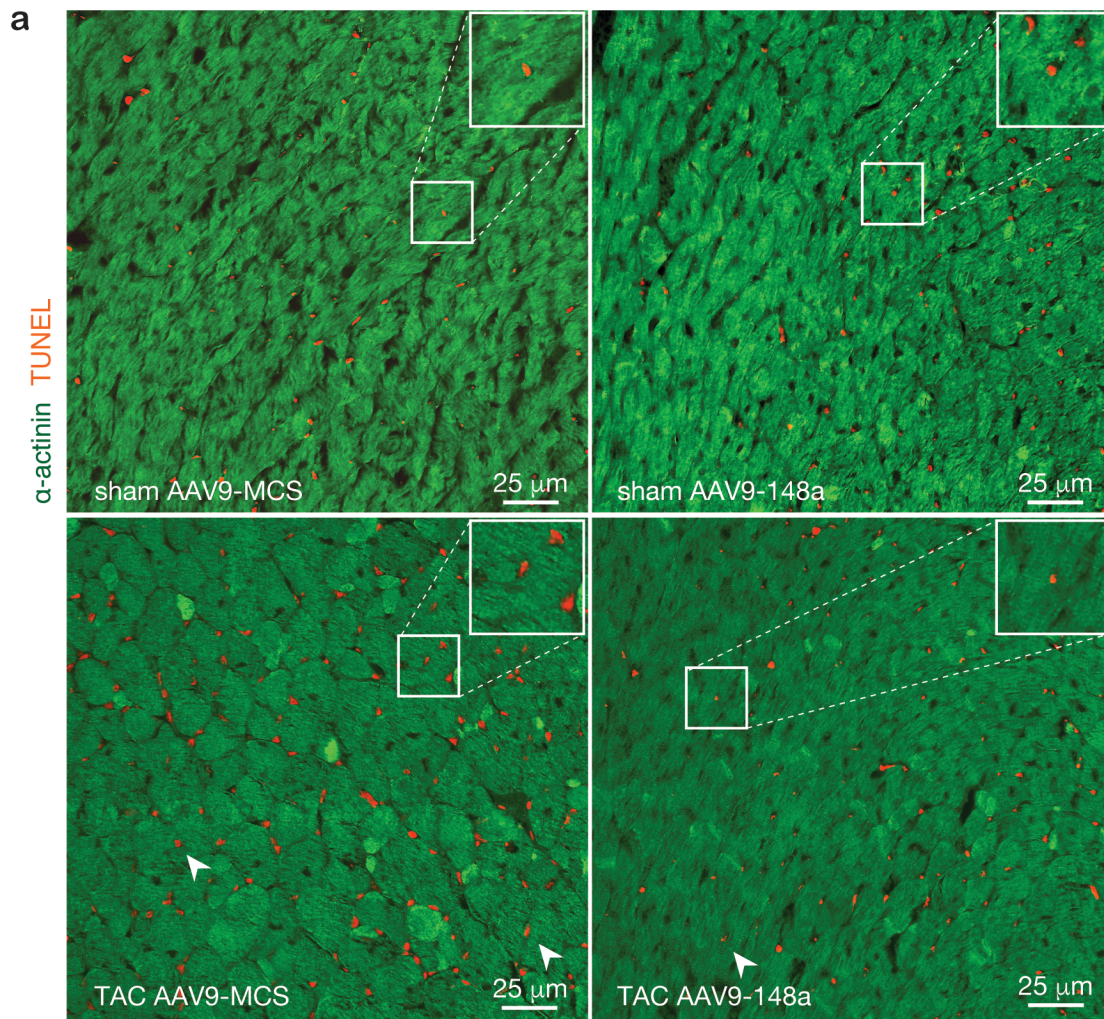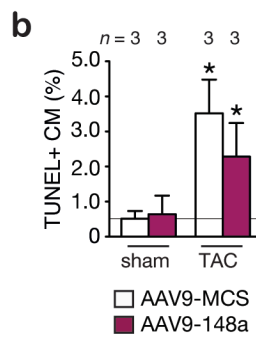

# Supplemental Figure 5

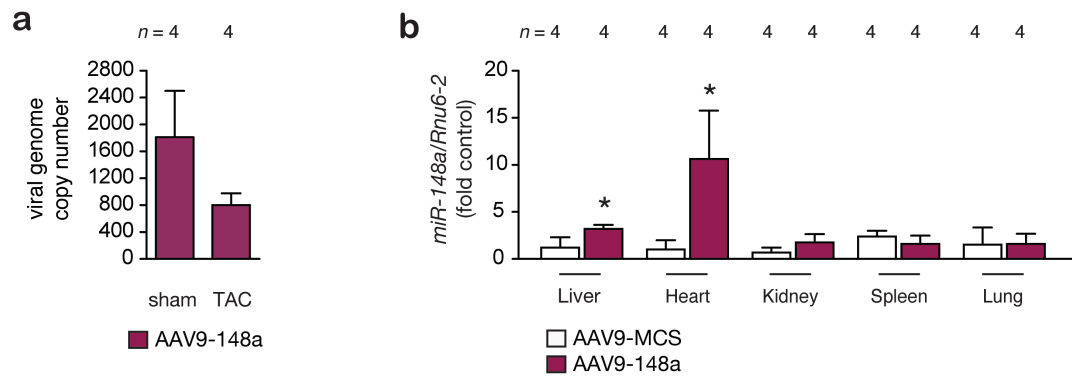

1 **Legends to the Supplementary Figures**

2

3 **Supplementary Figure 1 | *miR-148a* differentially regulates ERK5, ERK1/2, Akt**  
4 **downstream signaling in concentric and eccentric cardiac remodeling. (a)** Western  
5 blot analysis of myocardial LIFR expression and quantification at indicated time points.  
6 **(b-d)** Western blot analysis of phosphorylated and unphosphorylated forms of Akt, Erk5  
7 or Erk1/2 and quantification at indicated time points. **(e-h)** Western blot analysis of  
8 myocardial LIF, CNTF, IL-6 or OSM expression and quantification at indicated time  
9 points. **(i-k)** Western blot analysis of phosphorylated and unphosphorylated forms of Akt,  
10 Erk5 or Erk1/2 and quantification in hearts from mice subjected to sham or TAC surgery  
11 and receiving antagomir-148a or a control antagomir (antagomir-*Cel-39*). **(l-n)** Western  
12 blot analysis of myocardial gp130 or phosphorylated and unphosphorylated forms of Akt,  
13 Erk5 or Erk1/2 and quantification in hearts from mice receiving AAV9-148a or AAV9-  
14 MCS.

15 Data information: Data are means  $\pm$  SEM. One-way ANOVA with Newman-Keuls  
16 multiple comparison test was used to compare groups. *n*, number of independent WB  
17 experiments; AAV9, adeno-associated virus serotype 9; TAC, transverse aortic  
18 constriction. \**P* < 0.05 vs corresponding control group.

19

20 **Supplementary Figure 2 | CT-1 infusion results in cardiac dilation. (a-b)**

21 Evolutionary conservation of the other two *mmu-miR-148a* seed regions on gp130  
22 3'UTR. In mouse they are respectively located on the nucleotide position 6150-6156 and  
23 8532-8538 [ENSMUST00000183663.7]. **(c)** Study design of mice receiving continuous  
24 infusion of CT-1 (20  $\mu$ g/kg/day) or isoproterenol (60 mg/kg/day). **(d)** Representative  
25 image of whole hearts (top panels), H&E-stained cardiac sections (second panels), high  
26 magnification H&E-stained sections (third panels), or Sirius Red stained (lower panels)  
27 histological sections of hearts from saline, CT-1 infused and isoproterenol-infused mice.  
28 Measurements of **(e)** LV mass, **(f)** EF **(g)** IVSs in saline, CT-1-treated or isoproterenol-  
29 treated mice. **(h)** Confocal microscopy images of neonatal rat cardiomyocytes treated  
30 with scrambled or precursor-148a miR-148a with or without CT-1 stimulation. **(i)** Cell  
31 surface measurements from conditions in **(f)**.

32 Data information: Data are means  $\pm$  SEM. One-way ANOVA with Bonferonni's multiple  
33 comparison test was used to compare groups. *n*, number of mice CT-1, cardiotrophin 1;

1 LV, left ventricular; EF, ejection fraction; IVSs, Interventricular septum in systole. \* $P < 0.05$  vs corresponding control group; # $P < 0.05$  vs experimental group.

3  
4 **Supplementary Figure 3 | Immune response in hearts from mice with altered *miR-148a* expression.** (a) Representative confocal images of CD45 labeling in hearts after  
5 sham-operation or aortic banding in the presence of control antagomir targeting *C. elegans miR-39* (antagomir-*Cel-39*) or antagomir against *mmu-miR-148a-3p* (top and  
6 second panel), with CD45 positive cells (red), cardiomyocytes visualized with sarcomeric  
7 actin (green) and nuclei visualized with Hoechst (blue). Blood clot into the left ventricular  
8 chamber (left-bottom panel) and spleen (right-bottom panel) were used as internal and  
9 external staining positive controls.  
10  
11

12  
13 **Supplementary Figure 4 | Apoptotic events in hearts from mice with altered *miR-148a* expression.** (a) Representative confocal images of TUNEL labeling in hearts after  
14 sham-operation or aortic banding in the presence of AAV9-MCS or AAV9-148a, with  
15 TUNEL positive nuclei (red) and cardiomyocytes visualized with sarcomeric actin  
16 (green). (b) Quantification of TUNEL positive cardiomyocytes in experimental groups  
17 demonstrates a higher percentage of TUNEL positive myocytes after TAC compared to  
18 sham.  
19

20 Data information: Data are means  $\pm$  SEM. One-way ANOVA with Bonferroni's multiple  
21 comparison test was used to compare groups. *n*, number of mice; AAV9, adeno-  
22 associated virus; MCS, multiple cloning site; TAC, transverse aortic constriction. \* $P < 0.05$  vs corresponding control group.  
23  
24

25 **Supplementary Figure 5 | Characterization of AAV9 transduction treatment.** (a) RT-  
26 PCR analysis of viral genome copy numbers in 20ng of total DNA in hearts from mice  
27 receiving AAV9-148a virus. (b) RT-PCR analysis of *miR-148a-3p* expression in diverse  
28 organs from mice receiving AAV9-MCS or AAV9-148a virus.

29 Data information: Data are means  $\pm$  SEM. One-way ANOVA with Bonferroni's multiple  
30 comparison test was used to compare groups. *n*, number of mice; AAV9, adeno-  
31 associated virus; MCS, multiple cloning site. \* $P < 0.05$  vs corresponding control group.  
32



**Supplemental Table 1. Morphometric and echocardiographic characteristics of mice subjected to sham or TAC surgery and treated for 3 weeks with control (Ctrl) antagomir or antagomir-148a.**

|                          | Sham           |                | TAC            |                |
|--------------------------|----------------|----------------|----------------|----------------|
|                          | Ctrl antagomir | Antagomir-148a | Ctrl antagomir | Antagomir-148a |
| <b>n</b>                 | 5              | 5              | 8              | 8              |
| <b>BW (g)</b>            | 22.8±2.1       | 25.3±2.0       | 23.8±1.5       | 24.3±1.7       |
| <b>LV mass (mg)</b>      | 73±1           | 104±18*        | 120±19*        | 121±26*        |
| <b>LV mass/BW (mg/g)</b> | 3.2±0.2        | 3.8±0.4        | 5.2±0.4*       | 6.4±1.0*       |
| <b>IVSd (mm)</b>         | 0.87±0.03      | 0.84±0.06      | 0.89±0.14      | 0.87±0.13      |
| <b>IVSs (mm)</b>         | 1.42±0.01      | 1.33±0.10      | 1.03±0.16*     | 1.17±0.17      |
| <b>LVIDd (mm)</b>        | 3.39±0.10      | 3.57±0.25      | 3.66±0.54      | 3.62±0.57      |
| <b>LVIDs (mm)</b>        | 2.06±0.16      | 2.49±0.26      | 2.76±0.43*     | 2.78±0.50*     |
| <b>LVPWd (mm)</b>        | 0.76±0.06      | 1.08±0.12*     | 0.87±0.15      | 0.86±0.14      |
| <b>LVPWs (mm)</b>        | 1.12±0.09      | 1.18±0.15      | 0.96±0.14      | 1.07±0.16      |
| <b>EF (%)</b>            | 77±4           | 66±5*          | 57±3*          | 56±5*          |
| <b>FS (%)</b>            | 39±3           | 31±3*          | 25±2*          | 25±3*          |
| <b>E/A (mm/s)</b>        | 1.16±0.04      | 1.23±0.08      | 1.65±0.13*     | 1.57±0.24*     |

Data are expressed as means ± SEM. BW, body weight; LV, left ventricular; IVSd, interventricular septal thickness at end-diastole; IVSs, interventricular septal thickness at end-systole; LVIDd, left ventricular internal dimension at end-diastole; LVIDs, left ventricular internal dimension at end-systole; LVPWd, left ventricular posterior wall thickness at end-diastole; LVPWs, left ventricular posterior wall thickness at end-systole; EF, ejection fraction; FS, fractional shortening; E/A, Doppler E/A ratio. \*, indicates  $P < 0.05$  vs sham group subjected to treatment with a control antagomir; #, indicates  $P < 0.05$  vs experimental group.

**Supplemental Table 2. Morphometric and echocardiographic characteristics of mice subjected to sham or TAC surgery and treated for 6 weeks with control (Ctrl) antagomir or antagomir-148a.**

|                          | Sham           |                | TAC            |                |
|--------------------------|----------------|----------------|----------------|----------------|
|                          | Ctrl antagomir | Antagomir-148a | Ctrl antagomir | Antagomir-148a |
| <b>n</b>                 | 7              | 8              | 8              | 8              |
| <b>BW (g)</b>            | 22.5±1.6       | 25.6±1.6       | 25.6±1.2       | 24.0±1.6       |
| <b>LV mass (mg)</b>      | 84±3           | 77±11          | 135±26*        | 135±20         |
| <b>LV mass/BW (mg/g)</b> | 3.8±0.3        | 4.0±0.2        | 4.8±0.4*       | 6.1±0.5*       |
| <b>IVSd (mm)</b>         | 0.87±0.03      | 0.72±0.05      | 0.88±0.05      | 1.00±0.04      |
| <b>IVSs (mm)</b>         | 1.39±0.05      | 1.08±0.10*     | 1.13±0.06      | 1.22±0.11      |
| <b>LVIDd (mm)</b>        | 3.44±0.07      | 3.93±0.34      | 4.06±0.29      | 4.47±0.21*     |
| <b>LVIDs (mm)</b>        | 2.07±0.16      | 2.90±0.36      | 2.97±0.33*     | 3.62±0.25*     |
| <b>LVPWd (mm)</b>        | 0.89±0.03      | 0.69±0.04      | 1.04±0.12      | 0.85±0.08      |
| <b>LVPWs (mm)</b>        | 1.28±0.09      | 0.94±0.09      | 1.33±0.11      | 1.00±0.11      |
| <b>EF (%)</b>            | 78±4           | 59±6*          | 61±4*          | 47±4*          |
| <b>FS (%)</b>            | 40±4           | 27±4*          | 27±2*          | 20±2*          |
| <b>E/A (mm/s)</b>        | 1.33±0.13      | 1.32±0.17      | 1.52±0.17      | 1.27±0.04      |

Data are expressed as means ± SEM. BW, body weight; Ctrl, control; LV, left ventricular; IVSd, interventricular septal thickness at end-diastole; IVSs, interventricular septal thickness at end-systole; LVIDd, left ventricular internal dimension at end-diastole; LVIDs, left ventricular internal dimension at end-systole; LVPwd, left ventricular posterior wall thickness at end-diastole; LVPWs, left ventricular posterior wall thickness at end-systole; EF, ejection fraction; FS, fractional shortening; E/A, Doppler E/A ratio; TAC, transverse aortic constriction. \*, indicates  $P < 0.05$  vs sham group subjected to treatment with a control antagomir; #, indicates  $P < 0.05$  vs experimental group.

**Supplemental Table 3. Morphometric and echocardiographic characteristics of mice subjected to sham or TAC surgery and treated with AAV9-MCS or AAV9-miR-148a for 3 weeks.**

|                          | Sham      |              | TAC        |              |
|--------------------------|-----------|--------------|------------|--------------|
|                          | AAV9-MCS  | AAV9-miR148a | AAV9-MCS   | AAV9-miR148a |
| <b>n</b>                 | 8         | 5            | 10         | 14           |
| <b>BW (g)</b>            | 20.8±0.6  | 21.6±1.4     | 20.5±2.3   | 24.0±0.7     |
| <b>LV mass (mg)</b>      | 69±6      | 77±6         | 125±10*    | 118±6*       |
| <b>LV mass/BW (mg/g)</b> | 3.3±0.03  | 3.6±1.8      | 5.7±0.56*  | 5.0±0.22*    |
| <b>IVSd (mm)</b>         | 0.75±0.03 | 0.81±0.04    | 0.94±0.06* | 0.94±0.04*   |
| <b>IVSs (mm)</b>         | 1.13±0.04 | 1.19±0.05    | 1.24±0.07  | 1.33±0.04*   |
| <b>LVIDd (mm)</b>        | 3.61±0.10 | 3.67±0.10    | 4.07±0.12* | 3.98±0.06*   |
| <b>LVIDs (mm)</b>        | 2.47±0.10 | 2.54±0.10    | 3.10±0.17* | 2.97±0.11*   |
| <b>LVPWd (mm)</b>        | 0.68±0.06 | 0.72±0.03    | 0.97±0.05  | 0.96±0.03*   |
| <b>LVPWs (mm)</b>        | 1.03±0.05 | 1.03±0.02    | 1.24±0.05* | 1.25±0.03*   |
| <b>EF (%)</b>            | 67±2      | 69±1         | 53±5*      | 58±3*        |
| <b>FS (%)</b>            | 31±1      | 31±1         | 23±2*      | 26±2*        |

Data are expressed as means ± SEM. AAV, adeno-associated virus; BW, body weight; LV, left ventricular; IVSd, interventricular septal thickness at end-diastole; IVSs, interventricular septal thickness at end-systole; LVIDd, left ventricular internal dimension at end-diastole; LVIDs, left ventricular internal dimension at end-systole; LVPWd, left ventricular posterior wall thickness at end-diastole; LVPWs, left ventricular posterior wall thickness at end-systole; EF, ejection fraction; FS, fractional shortening; MCS, multiple cloning site; TAC, transverse aortic constriction. \*, indicates  $P < 0.05$  vs AAV-MCS sham group; #, indicates  $P < 0.05$  vs experimental group.

**Supplemental Table 4. Morphometric and echocardiographic characteristics of mice subjected to sham or TAC surgery and treated with AAV9-MCS or AAV9-miR-148a for 6 weeks.**

|                          | Sham      |              | TAC        |              |
|--------------------------|-----------|--------------|------------|--------------|
|                          | AAV9-MCS  | AAV9-miR148a | AAV9-MCS   | AAV9-miR148a |
| <b>n</b>                 | 11        | 10           | 10         | 14           |
| <b>BW (g)</b>            | 19.1±0.5  | 23.8±1.0     | 22.6±1.2   | 25.1±0.9     |
| <b>LV mass (mg)</b>      | 82±3      | 99±8         | 102±7*     | 116±5*       |
| <b>LV mass/BW (mg/g)</b> | 3.9±0.1   | 4.1±0.2      | 4.6±0.4*   | 4.6±0.2*     |
| <b>IVSd (mm)</b>         | 0.84±0.02 | 0.93±0.02*   | 0.85±0.02  | 0.91±0.02*#  |
| <b>IVSs (mm)</b>         | 1.21±0.05 | 1.39±0.03*   | 1.17±0.05  | 1.26±0.03    |
| <b>LVIDd (mm)</b>        | 3.57±0.07 | 3.58±0.08    | 4.06±0.14* | 4.09±0.08*   |
| <b>LVIDs (mm)</b>        | 2.27±0.10 | 2.22±0.09    | 3.23±0.19* | 3.08±0.11*   |
| <b>LVPWd (mm)</b>        | 0.82±0.02 | 0.95±0.10    | 0.79±0.03* | 0.92±0.02#   |
| <b>LVPWs (mm)</b>        | 1.23±0.03 | 1.38±0.09    | 1.00±0.04* | 1.22±0.03#   |
| <b>EF (%)</b>            | 74±2      | 76±2         | 46±5*      | 57±3*#       |
| <b>FS (%)</b>            | 37±2      | 38±2         | 19±2*      | 26±2*#       |
| <b>E/A (mm/s)</b>        | 1.24±0.04 | 1.25±0.05    | 1.35±0.03  | 1.19±0.02    |

Data are expressed as means ± SEM. AAV, adeno-associated virus; BW, body weight; LV, left ventricular; IVSd, interventricular septal thickness at end-diastole; IVSs, interventricular septal thickness at end-systole; LVIDd, left ventricular internal dimension at end-diastole; LVIDs, left ventricular internal dimension at end-systole; LVPWd, left ventricular posterior wall thickness at end-diastole; LVPWs, left ventricular posterior wall thickness at end-systole; EF, ejection fraction; FS, fractional shortening; E/A, Doppler E/A ratio; MCS, multiple cloning site; TAC, transverse aortic constriction. \*, indicates  $P < 0.05$  vs AAV-MCS sham group; #, indicates  $P < 0.05$  vs experimental group.

**Supplemental Table 5. Morphometric and echocardiographic characteristics of mice subjected to sham or TAC surgery for 3 weeks, before treatment with AAV9-MCS or AAV9-miR-148a at 4 weeks after surgery.**

|                          | Sham      |              | TAC        |              |
|--------------------------|-----------|--------------|------------|--------------|
|                          | AAV9-MCS  | AAV9-miR148a | AAV9-MCS   | AAV9-miR148a |
| <b>n</b>                 | 9         | 10           | 10         | 11           |
| <b>BW (g)</b>            | 21.1±0.18 | 21.2±0.3     | 19.4±0.3   | 19.5±0.4     |
| <b>LV mass (mg)</b>      | 79±3      | 85±4         | 97±3*      | 101±5*       |
| <b>LV mass/BW (mg/g)</b> | 3.7±0.12  | 4.0±0.22     | 5.0±0.17*  | 5.2±0.25*    |
| <b>IVSd (mm)</b>         | 0.68±0.02 | 0.71±0.08    | 0.90±0.03* | 0.94±0.03*   |
| <b>IVSs (mm)</b>         | 0.99±0.04 | 1.05±0.10    | 1.23±0.04* | 1.32±0.05*   |
| <b>LVIDd (mm)</b>        | 3.31±0.06 | 3.39±0.34    | 3.69±0.06* | 3.72±0.06*   |
| <b>LVIDs (mm)</b>        | 2.14±0.06 | 2.15±0.21    | 2.59±0.05* | 2.59±0.11*   |
| <b>LVPWd (mm)</b>        | 0.72±0.04 | 0.77±0.09    | 0.92±0.02* | 0.90±0.06*   |
| <b>LVPWs (mm)</b>        | 1.03±0.02 | 1.08±0.10    | 1.22±0.03* | 1.20±0.06*   |
| <b>EF (%)</b>            | 73±2      | 74±3         | 65±2*      | 65±3*        |
| <b>FS (%)</b>            | 35±1      | 37±2         | 30±2*      | 30±3*        |

Data are expressed as means ± SEM. AAV, adeno-associated virus; BW, body weight; LV, left ventricular; IVSd, interventricular septal thickness at end-diastole; IVSs, interventricular septal thickness at end-systole; LVIDd, left ventricular internal dimension at end-diastole; LVIDs, left ventricular internal dimension at end-systole; LVPWd, left ventricular posterior wall thickness at end-diastole; LVPWs, left ventricular posterior wall thickness at end-systole; EF, ejection fraction; FS, fractional shortening; MCS, multiple cloning site; TAC, transverse aortic constriction. \*, indicates  $P < 0.05$  vs AAV-MCS sham group; #, indicates  $P < 0.05$  vs experimental group.

**Supplemental Table 6. Morphometric and echocardiographic characteristics of 3 weeks sham and TAC surgery followed by a 1 week post-treatment with AAV-MCS or AAV9-miR-148a.**

|                          | Sham      |              | TAC        |              |
|--------------------------|-----------|--------------|------------|--------------|
|                          | AAV9-MCS  | AAV9-miR148a | AAV9-MCS   | AAV9-miR148a |
| <b>n</b>                 | 9         | 10           | 10         | 11           |
| <b>BW (g)</b>            | 21.2±0.22 | 21.3±0.35    | 20.7±0.47  | 20.91±0.34   |
| <b>LV mass (mg)</b>      | 80.5±4    | 89.2±3       | 101±7*     | 102±5*       |
| <b>LV mass/BW (mg/g)</b> | 3.7±0.16  | 4.2±0.13     | 4.7±0.25*  | 4.9±0.27*    |
| <b>IVSd (mm)</b>         | 0.73±0.03 | 0.78±0.03    | 0.83±0.04* | 0.89±0.04*   |
| <b>IVSs (mm)</b>         | 1.19±0.04 | 1.10±0.03    | 1.14±0.04  | 1.22±0.03*   |
| <b>LVIDd (mm)</b>        | 3.83±0.04 | 3.91±0.09    | 4.03±0.08* | 3.91±0.07*   |
| <b>LVIDs (mm)</b>        | 2.52±0.06 | 2.75±0.11    | 3.14±0.10* | 2.88±0.09*^  |
| <b>LVPWd (mm)</b>        | 0.78±0.04 | 0.81±0.04    | 0.85±0.06  | 0.87±0.05    |
| <b>LVPWs (mm)</b>        | 1.11±0.03 | 1.13±0.56    | 1.02±0.05  | 1.18±0.04^   |
| <b>EF (%)</b>            | 72±2      | 65±9         | 53±2*      | 59±3*        |
| <b>FS (%)</b>            | 34±1      | 30±2         | 23±2*      | 26±2*        |

Data are expressed as means ± SEM. AAV, adeno-associated virus; BW, body weight; LV, left ventricular; IVSd, interventricular septal thickness at end-diastole; IVSs, interventricular septal thickness at end-systole; LVIDd, left ventricular internal dimension at end-diastole; LVIDs, left ventricular internal dimension at end-systole; LVPWd, left ventricular posterior wall thickness at end-diastole; LVPWs, left ventricular posterior wall thickness at end-systole; EF, ejection fraction; FS, fractional shortening; TAC, transverse aortic constriction. \*, indicates  $P < 0.05$  vs AAV-MCS sham group; #, indicates  $P < 0.05$  vs experimental group.

**Supplemental Table 7. Morphometric and echocardiographic characteristics of mice subjected to 7 weeks of sham or TAC surgery and treated AAV9-MCS or AAV9-miR-148a for 3 weeks.**

|                          | Sham      |              | TAC        |              |
|--------------------------|-----------|--------------|------------|--------------|
|                          | AAV9-MCS  | AAV9-miR148a | AAV9-MCS   | AAV9-miR148a |
| <b>n</b>                 | 9         | 10           | 10         | 11           |
| <b>BW (g)</b>            | 22.0±0.3  | 22.0±0.5     | 21.2±0.3   | 22.0±0.5     |
| <b>LV mass (mg)</b>      | 88±4      | 86±3         | 105±6*     | 116±5*       |
| <b>LV mass/BW (mg/g)</b> | 4.0±0.2   | 3.9±0.1      | 4.8±0.3*   | 5.3±0.3*     |
| <b>IVSd (mm)</b>         | 0.73±0.03 | 0.79±0.04    | 0.83±0.05* | 0.90±0.03*   |
| <b>IVSs (mm)</b>         | 1.07±0.03 | 1.07±0.06    | 1.15±0.05  | 1.20±0.04*   |
| <b>LVIDd (mm)</b>        | 3.85±0.04 | 3.79±0.06    | 4.20±0.10* | 4.02±0.08*   |
| <b>LVIDs (mm)</b>        | 2.62±0.04 | 2.59±0.08    | 3.31±0.15* | 2.90±0.08*#  |
| <b>LVPWd (mm)</b>        | 0.89±0.08 | 0.84±0.04    | 0.80±0.05  | 0.94±0.05#   |
| <b>LVPWs (mm)</b>        | 1.17±0.05 | 1.13±0.04    | 1.01±0.06  | 1.23±0.05#   |
| <b>EF (%)</b>            | 70±2      | 68±9         | 50±4*      | 61±2*#       |
| <b>FS (%)</b>            | 32±1      | 31±2         | 21±2*      | 27±1#        |

Data are expressed as means ± SEM. AAV, adeno-associated virus; BW, body weight; LV, left ventricular; IVSd, interventricular septal thickness at end-diastole; IVSs, interventricular septal thickness at end-systole; LVIDd, left ventricular internal dimension at end-diastole; LVIDs, left ventricular internal dimension at end-systole; LVPWd, left ventricular posterior wall thickness at end-diastole; LVPWs, left ventricular posterior wall thickness at end-systole; EF, ejection fraction; FS, fractional shortening; MCS, multiple cloning site; TAC, transverse aortic constriction. \*, indicates  $P < 0.05$  vs AAV-MCS sham group; #, indicates  $P < 0.05$  vs experimental group.

**Supplemental Table 8. Patient and donor characteristics.**

|                   | <b>Gender</b> | <b>Age at Htx<br/>(yrs)</b> | <b>LVAD</b> | <b>LVEF<br/>(%)</b> | <b>LV ED/ES<br/>(mm)</b> | <b>LV PWT<br/>(mm)</b> |
|-------------------|---------------|-----------------------------|-------------|---------------------|--------------------------|------------------------|
| <b>DCM 1</b>      | female        | 48                          | yes         | 10                  | 68/65                    | 7                      |
| <b>DCM 2</b>      | male          | 55                          | no          | 20                  | 69/65                    | 8                      |
| <b>DCM 3</b>      | male          | 57                          | yes         | 15                  | 47/43                    | 10                     |
| <b>DCM 4</b>      | male          | 47                          | no          | 25                  | 51/49                    | 10                     |
| <b>DCM 5</b>      | male          | 66                          | no          | 25                  | 58/54                    | 10                     |
| <b>DCM 6</b>      | female        | 21                          | yes         | 15                  | 61/54                    | 6                      |
| <b>DCM 7</b>      | female        | 58                          | yes         | 15                  | 65/57                    | 8                      |
| <b>DCM 8</b>      | male          | 36                          | yes         | 15                  | 69/63                    | 8                      |
| <b>DCM 9</b>      | female        | 58                          | yes         | 20                  | 67/62                    | 6                      |
| <b>DCM 10</b>     | male          | 61                          | yes         | 10                  | 62/60                    | 7                      |
| <b>HCM 1</b>      | male          | 57                          | no          | 55                  | 43/42                    | 16                     |
| <b>HCM 2</b>      | male          | 31                          | no          | 15                  | 85/81                    | 13                     |
| <b>HCM 3</b>      | male          | 37                          | no          | 20                  | 66/54                    | 13                     |
| <b>HCM 4</b>      | male          | 36                          | no          | 25                  | 47/39                    | 15                     |
| <b>HCM 5</b>      | female        | 31                          | no          | 50                  | 29/10                    | 18                     |
| <b>HCM 6</b>      | female        | 36                          | no          | 40                  | 45/20                    | 14                     |
| <b>HCM 7</b>      | male          | 25                          | no          | 45                  | 40/20                    | 20                     |
| <b>HCM 8</b>      | female        | 36                          | no          | 45                  | 45/28                    | 15                     |
| <b>HCM 9</b>      | female        | 34                          | no          | 20                  | 52/40                    | 13                     |
| <b>Control 1</b>  | -             | -                           | no          | -                   | -                        | -                      |
| <b>Control 2</b>  | -             | -                           | no          | -                   | -                        | -                      |
| <b>Control 3</b>  | male          | 65                          | no          | -                   | -                        | -                      |
| <b>Control 4</b>  | female        | 72                          | no          | -                   | -                        | -                      |
| <b>Control 5</b>  | male          | 39                          | no          | -                   | -                        | -                      |
| <b>Control 6</b>  | female        | 48                          | no          | -                   | -                        | -                      |
| <b>Control 7</b>  | male          | 38                          | no          | -                   | -                        | -                      |
| <b>Control 8</b>  | female        | 53                          | no          | -                   | -                        | -                      |
| <b>Control 9</b>  | male          | 32                          | no          | -                   | -                        | -                      |
| <b>Control 10</b> | male          | 43                          | no          | -                   | -                        | -                      |
| <b>Control 11</b> | male          | 48                          | no          | -                   | -                        | -                      |

DCM, dilated cardiomyopathy; HCM, hypertrophic cardiomyopathy; LVAD, patient received left ventricular assist device; LVEF, left ventricular ejection fraction; LV ED, left ventricular end-diastolic dimension; LV ES, left ventricular end-systolic dimension; LVPWT, left ventricular posterior wall thickness; yrs, years; mm, millimeter; -, information not available,.
